# Supplementary material for: Insights into the nuclearity and local environment of transition metal species in ion-exchanged CHA zeolites and effects on the oxidation of methane
Source: Research Square preprint supplement (doi:10.21203/rs.3.rs-5751834/v1), 2025-02-12
Supplement: Supplementary file 1 [file a86e47f26f2111bdbdaad174.docx]

**Supporting information**

**Insights into the nuclearity and local environment of transition metal species in ion-exchanged CHA zeolites and effects on the oxidation of methane**

Peipei Xiao a,Lizhuo Wang b, Maiko Nishibori c, Kengo Nakamura a, Yong Wang a, Jun Huang b, Hermann Gies a,Toshiyuki Yokoi a,d*

a Institute of Integrated Research, Institute of Science Tokyo, 4259 Nagatsuta, Midori-ku, Yokohama 226-8501, Japan

b School of Chemical and Biomolecular Engineering, the University of Sydney, Sydney, New South Wales 2006, Australia

c International Center for Synchrotron Radiation Innovation Smart, Tohoku University, 2-1-1 Katahira, Aoba-ku, Sendai, Miyagi, 980-8572, Japan

d iPEACE223 Inc., Konwa Building, 1-12-22 Tsukiji, Chuo-ku, Tokyo, 104-0045, Japan

*E-mail: yokoi@cat.res.titech.ac.jp

**Supplementary Methods**

**Catalyst characterization**

XRD pattern was collected on a Rint-Ultima III (Rigaku) using a Cu Kα X-ray source (40 kV, 40 mA).

Elemental analyses of the samples were performed on an inductively coupled plasma-atomic emission spectrometer (ICP-AES, Shimadzu ICPE-9000).

Field-emission scanning electron microscopic (FE-SEM) images of the powder samples were obtained on SU-9000 (Hitachi) microscope operating at 1 kV.

High-angle annular dark field scanning transmission electron microscopy (HAADF-STEM) imaging, integrated differential phase contrast STEM (STEM-iDPC) imaging, and energy dispersive spectrometry (EDS) mapping were performed on a FEI Themis Z microscope equipped with an XFEG field electron source and double aberration corrector operated on 300 keV. The HAADF-STEM images were acquired with a camera length of 115 mm while the beam convergence was 25.1 mrads. The pixel size is 37 pm and the dwell time is 2 us/pixel. The collection angle of the HAADF detector was set to 48–200 mrads. STEM-EDS elemental maps were acquired with 4 us/pixel acquisition time using Velox software. High-resolution transmission electron microscopy (HRTEM) images were acquired on the same image operated on 300 keV.

Nitrogen adsorption and desorption measurements to obtain the information on the micro- and meso-porosities were conducted at -196 oC on a Belsorp-mini II (MicrotracBEL).

The carbon deposit amount of the spent samples was determined by the weight loss from 250 to 800 oC in a thermogravimetric (TG) profile, which was performed on a thermogravimetric-differential thermal analyzer (TG-DTA, RigakuThermo plus EVO II).

Temperature-programmed ammonia desorption (NH3-TPD) profiles were recorded on Multitrack TPD equipment (Japan BEL). Typically, 25 mg of catalyst was pretreated at 600 oC in He flow (50 mL min−1) for 1 h and then cooled to 100 oC. Prior to the adsorption of NH3, the sample was evacuated at 100 oC for 1 h. Approximately 2500 Pa of NH3 was allowed to contact with the sample at 100 oC for 10 min. Subsequently, the sample was evacuated to remove weakly adsorbed NH3 at the same temperature for 30 min. Finally, the sample was cooled to 100 oC and heated from 100 to 600 oC at a ramping rate of 10 oC min−1 in a He flow (50 mL min−1). A thermal conductivity detector (TCD) was employed to monitor desorbed NH3. The amount of acid sites was determined by the fitting peak area.

UV-vis spectra were collected in the range of 190-800 nm on a V-650DS spectrometer (JASCO). The diffuse reflectance spectra were converted into the absorption spectra using the Kubelka-Munk function.

UV-vis spectra at different temperatures were measured on a V-750 spectrometer (JASCO). The sample was purged by 20 mL·min−1 Ar in the measurement. The diffuse reflectance spectra were converted into the absorption spectra using the Kubelka-Munk function.

Fe, Co, and Cu K-edge X-ray absorption spectroscopy (XAS) were conducted with a transmission mode to characterize the oxidation state and the local structure of Fe, Co and Cu species, respectively. Spectra were obtained using synchrotron radiation at the SPring-8 BL01B1 beamline in Hyogo, Japan, equipped with a Si(111) double-crystal monochromator, 100% N2 for *I*0 ion chamber and 15% Ar/N2 for *I*1 ion chamber. The obtained XAS spectra were analyzed using Athena software version 0.9.26.1 The oscillations of *k*2-weighted Fe K-edge extended X-ray absorption fine structure (EXAFS) were Fourier-transformed (FT) in the *k* range from 3.0 to 10.0 Å-1.1

The N2O adsorption FTIR was carried out in the FTIR system by using a JASCO 4100 FTIR spectrometer equipped with a triglycine sulfate (TGS) detector. IR spectra of the clean disk were recorded in vacuo at 25 oC to obtain background spectrum. The sample was pressed into a self-supporting disk (20 mm diameter, 30−60 mg) and placed in an IR cell attached to a closed-gas circulation system. The sample was pretreated by evacuation at 500 oC for 1 h, followed by adsorption of 5−250 Pa N2O at 25 oC.

**Catalytic activity test**

The continuous oxidation of methane reaction was performed in a fixed-bed flow reactor (Fig. S6). Typically, 100 mg of catalyst in a pellet form (pellet size 500−1000 μm) was charged into a quartz tube (inner diameter 4 mm), which was placed in an electric tube furnace. The catalyst was pretreated at 500 °C for 1 h. The reaction was conducted at typically 350 °C. The outlet gas, containing the products, unreacted CH4 and N2O were analyzed using two on-line gas chromatographs (GC; GC-2014, Shimadzu). One of the GCs was equipped with a Shincarbon ST 50/80 packed column (3 mm×6 m) and a TCD detector. Specifically, GC-TCD with a methanizer was employed to detect H2, N2O, CO, CO2, and CH4. The other GC was equipped with a HP-PLOT Q packed column (0.53 mm×30 m×40 μm), a flame ionization detector (FID). The GC-FID was used to investigate CH4, and the produced methanol (MeOH), dimethyl ether (DME), low olefins and alkanes. The yield of each carbon-containing product was calculated by considering the number of carbon atoms. The methane conversion in this study was defined as the total obtained products, and calculated as:

*C*CH4 =

where *C*CH4 is the CH4 conversion, *i* is the number of carbon atoms in product C*i*, meanwhile, *Ci is the* carbon amount of product C*i*,Σ(*i*Ci*) is the total carbon amount of all the carbon-containing products, and *CH4* is the amount of CH4 detected at the same time.

The N2O conversion was calculated as:

*C*N2O =

where *C*N2O is the N2Oconversion, n*i* is the initial N2O molar weight, na is the N2O molar weight after reaction.

The product selectivity is calculated as:

*S*Ci =

where *S*Ci is the selectivity of the product Ci, *i* is the number of carbon atoms in product C*i*, Σ(*i*Ci*) is the total carbon amount of all the products.

The product yield is calculated as:

*Y*Ci =

where *Y*Ci is the yield of the product Ci, *i* is the number of carbon atoms in product C*i*, Σ(*i*Ci*) is the total carbon amount of all the products, and *CH4* is the amount of CH4 detected at the same time.

The product formation rates are calculated as:

*R*Ci = *Y*Ci **F*CH4/*mcat*

where *R*Ci is the formation rate of product C*i*, *Y*Ci is the yield of the product C*i*, *F*CH4 is the initial flow rate of CH4, *mcat* is the mass of the catalyst.

**
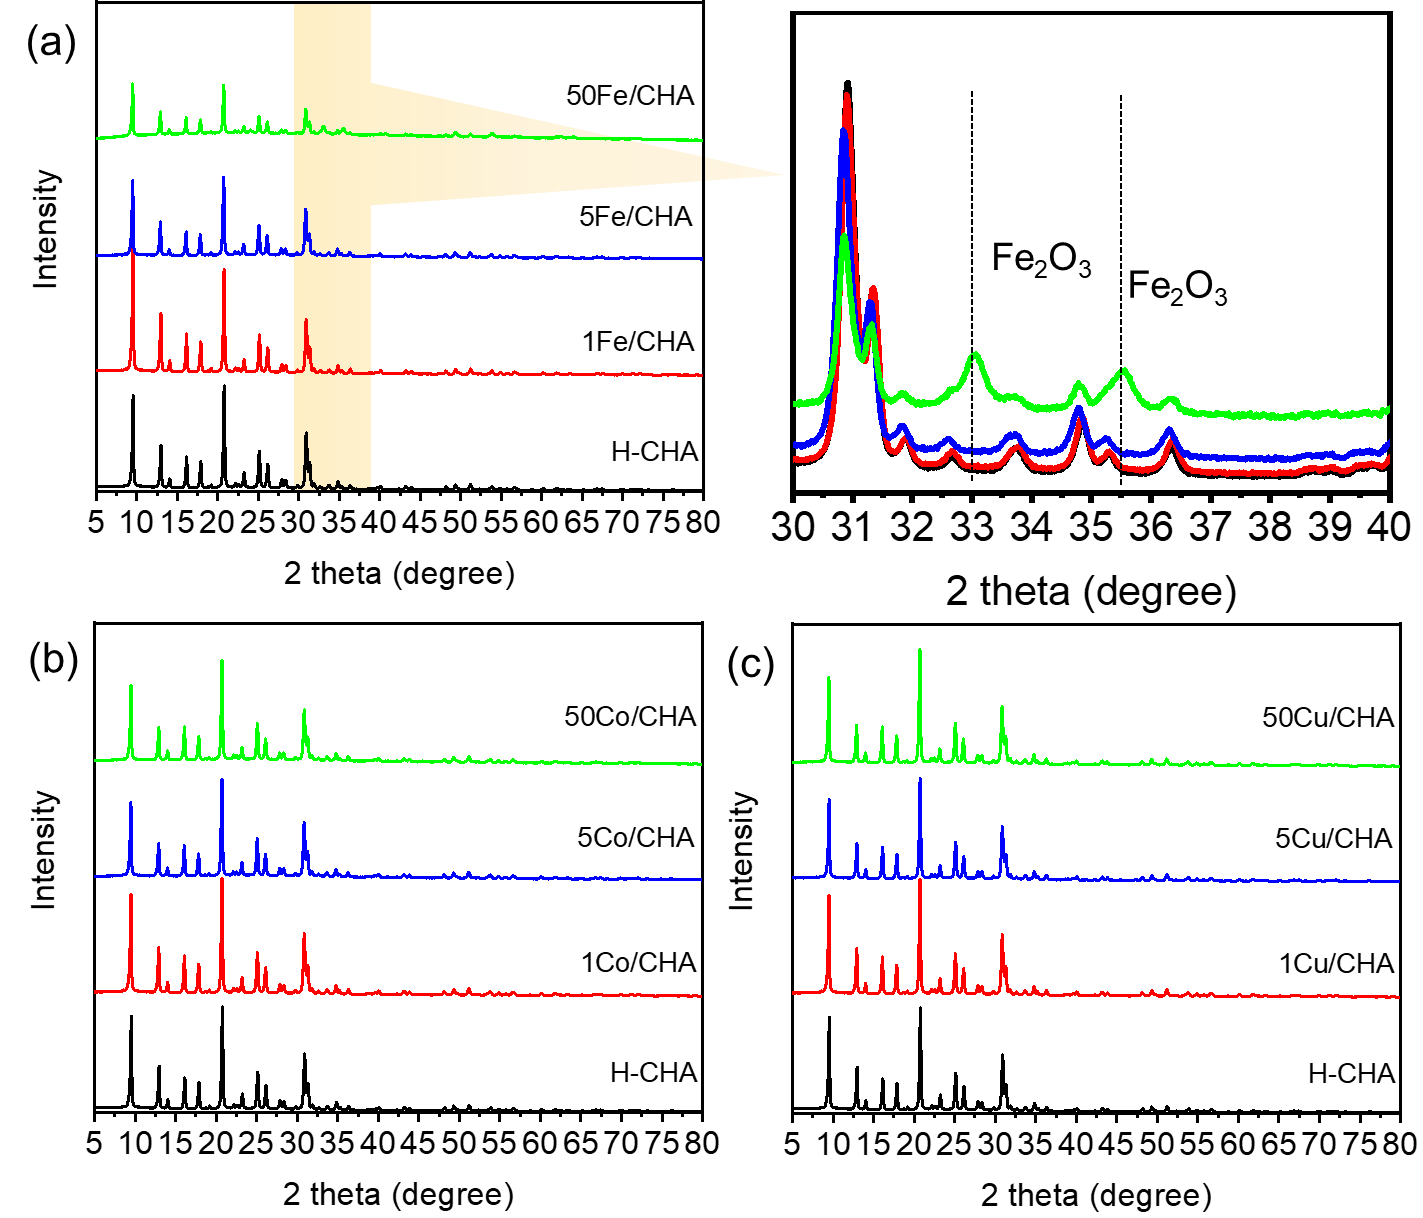
Fig. S1** XRD patterns of (a) *x*Fe/CHA, (b) yCo/CHA, and (c) *z*Cu/CHA zeolite catalysts.


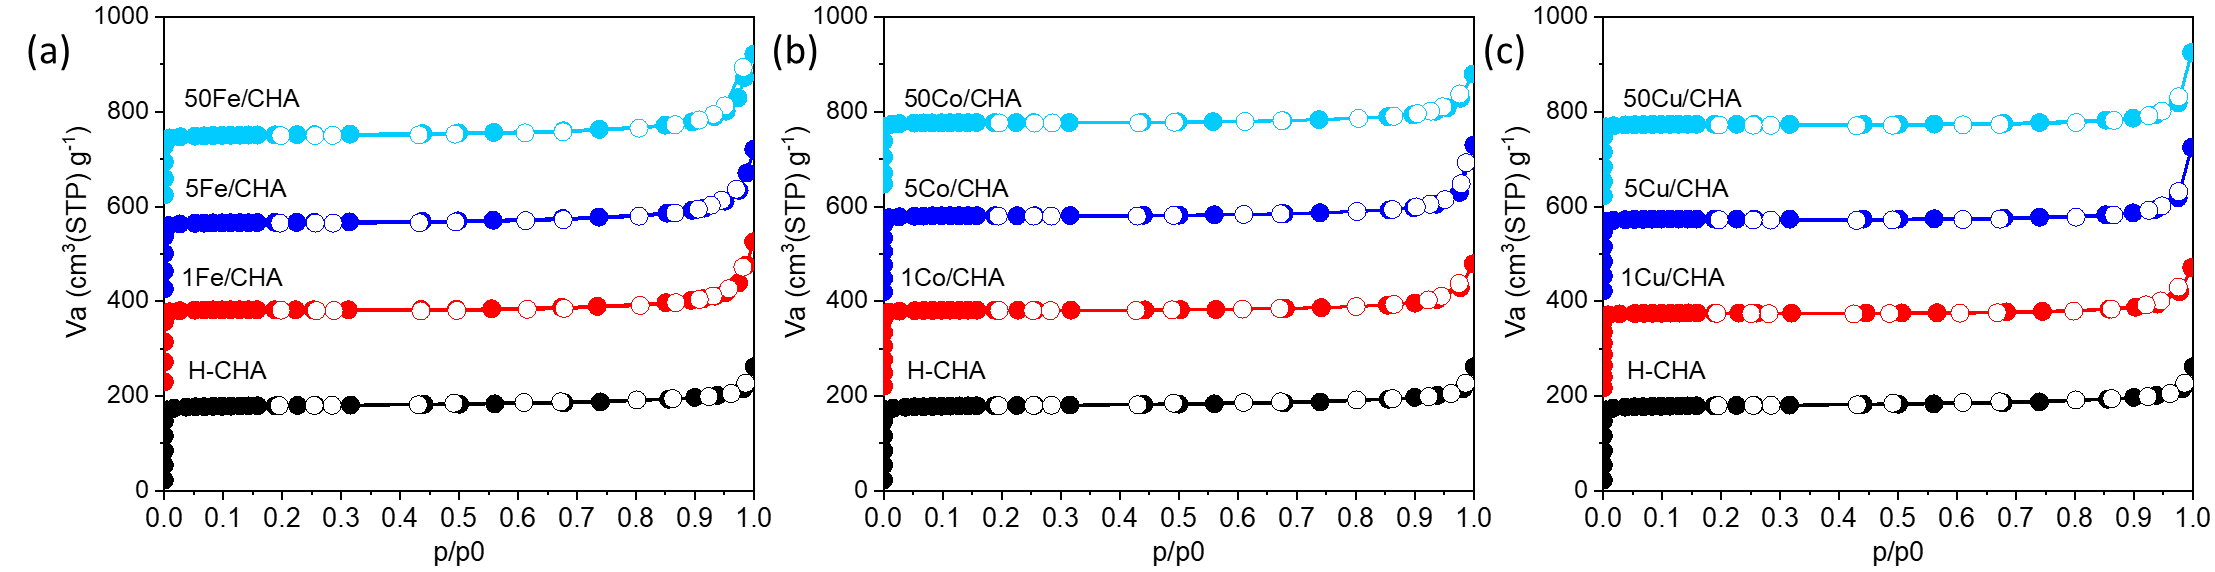
**Fig. S2** N2 adsorption and desorption isothermals of (a) *x*Fe/CHA, (b) *y*Co/CHA, and (c) *z*Cu/CHA zeolite catalysts.


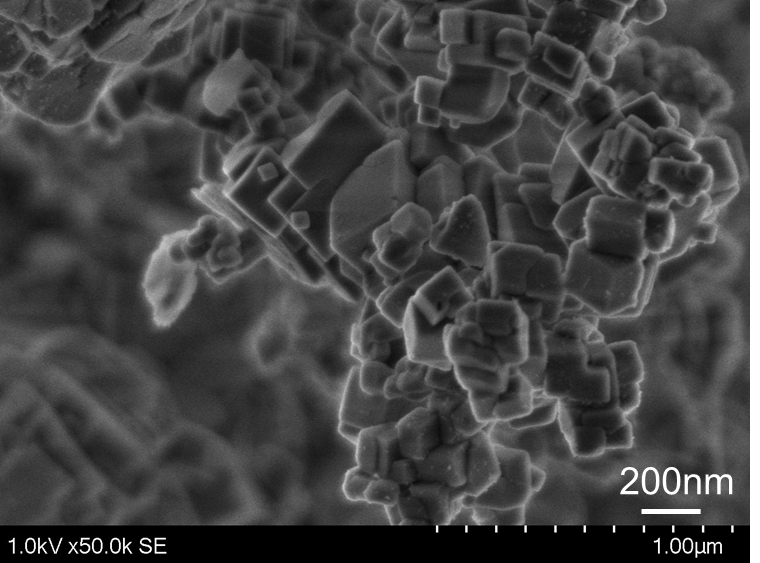


**Fig. S3** SEM image of parent CHA zeolite (H-SSZ-13, ACS-MSZ13021).


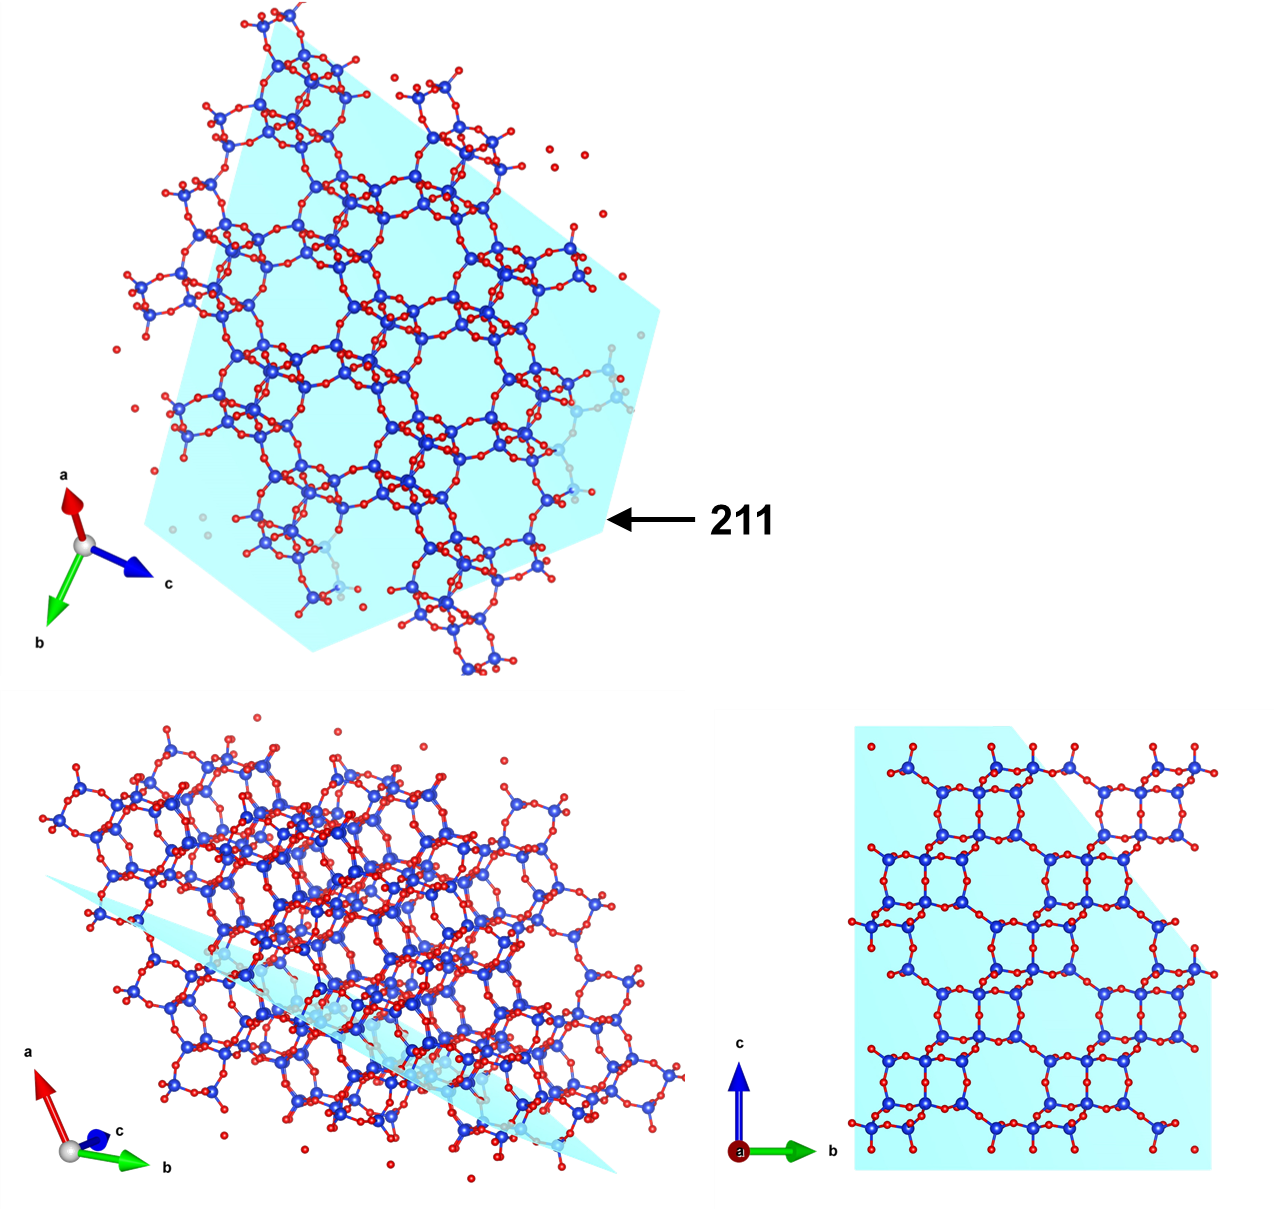
**Fig. S4** [211] crystal face of CHA zeolite from different directions.

**
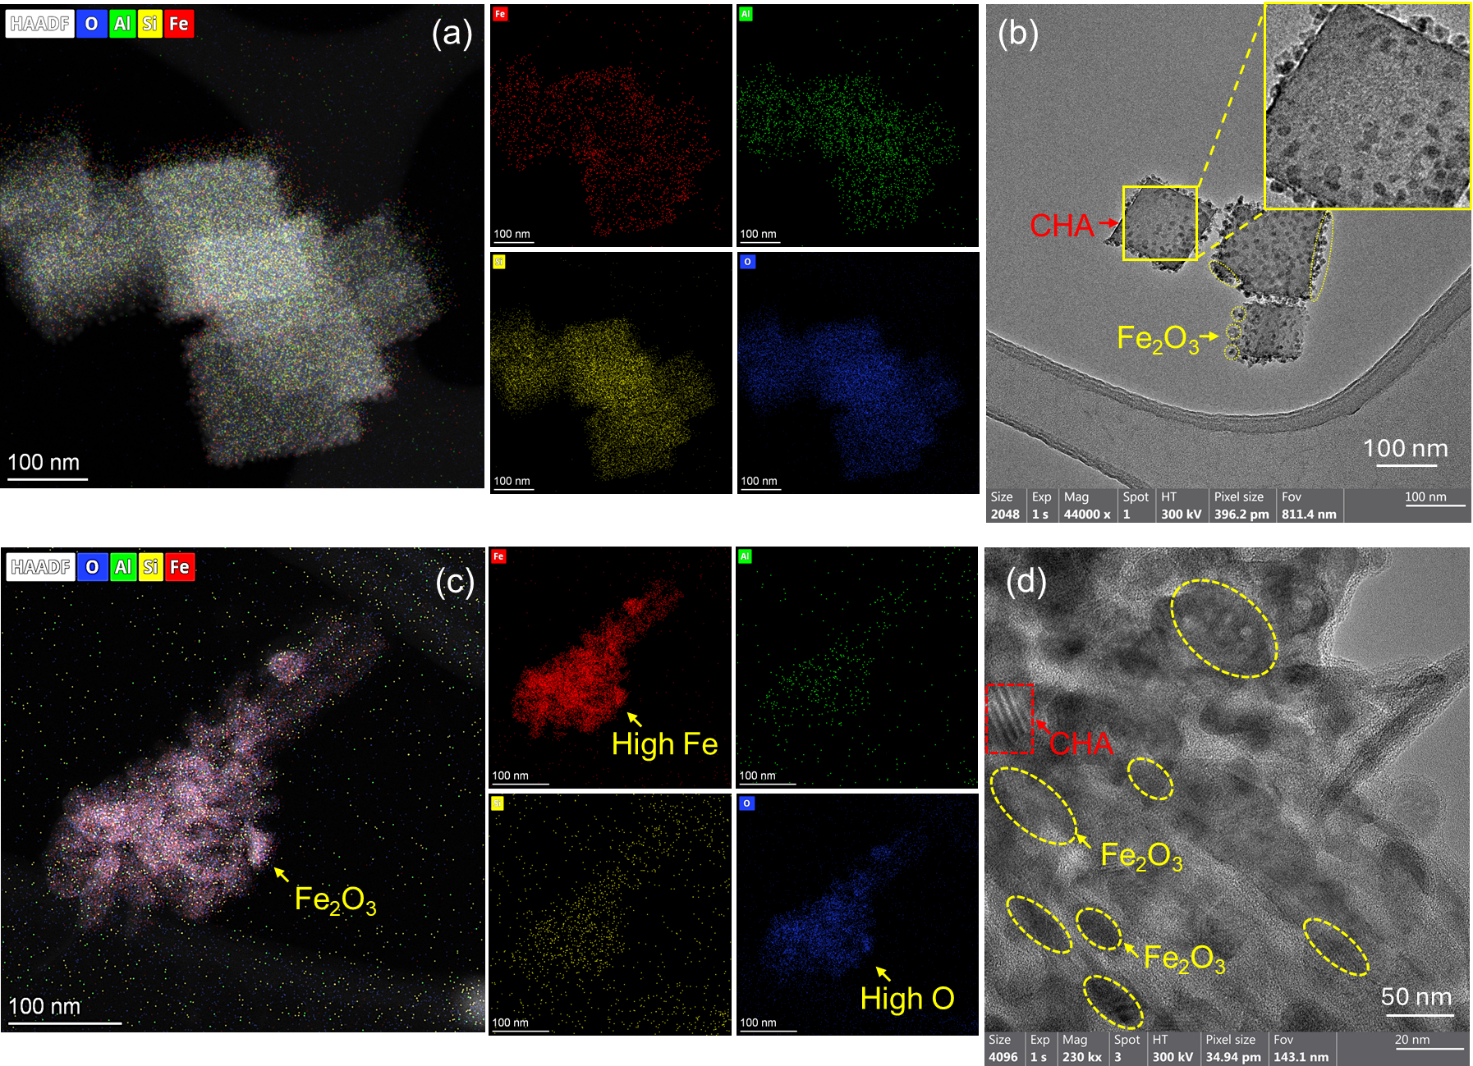
**

**Fig. S5** HAADF-STEM images and the corresponding EDS elemental mapping images of (a) 5Fe/CHA and (c) 50Fe/CHA zeolite catalysts. HRTEM images of (b) 5Fe/CHA and (d) 50Fe/CHA zeolite catalysts.


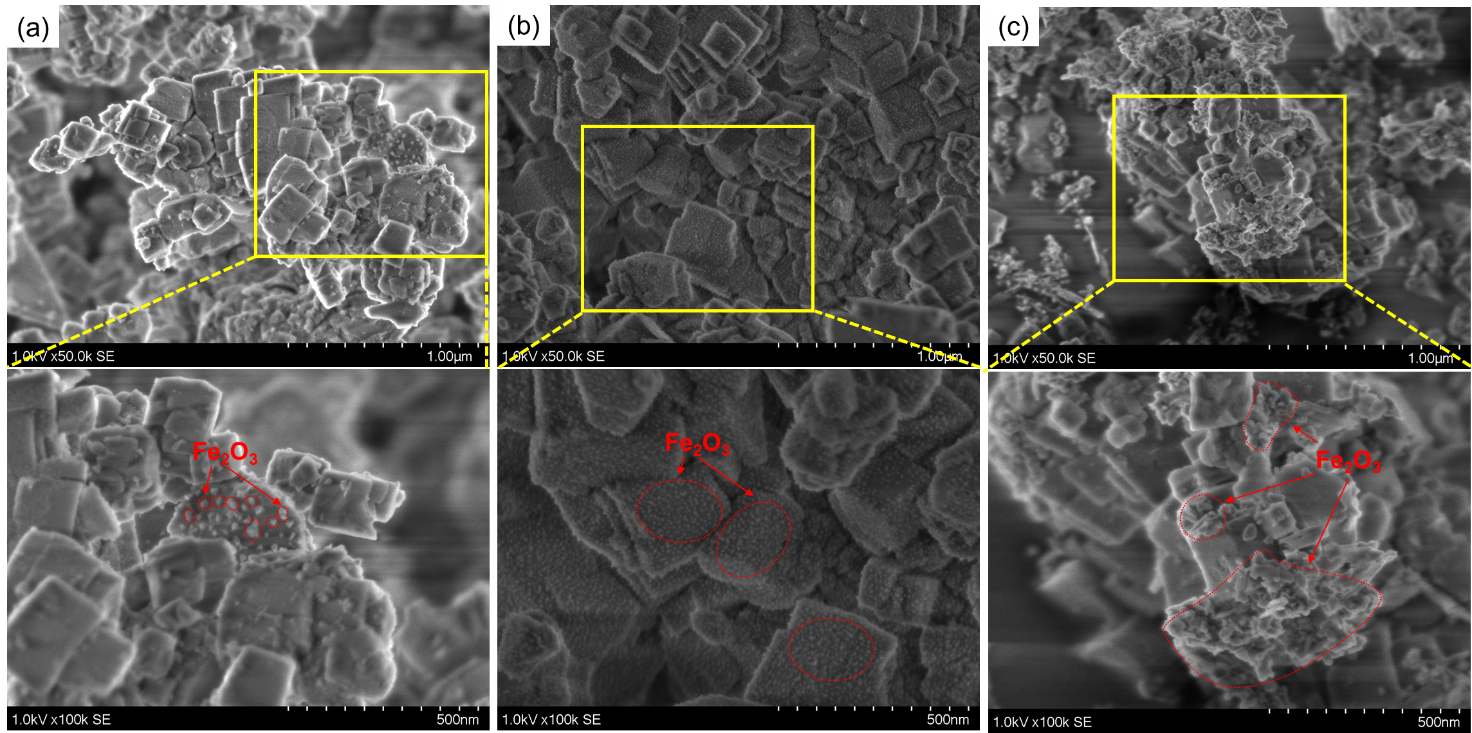


**Fig. S6** SEM images of (a) 1Fe/CHA, (b) 5Fe/CHA, (c) 50Fe/CHA zeolite catalysts.

**
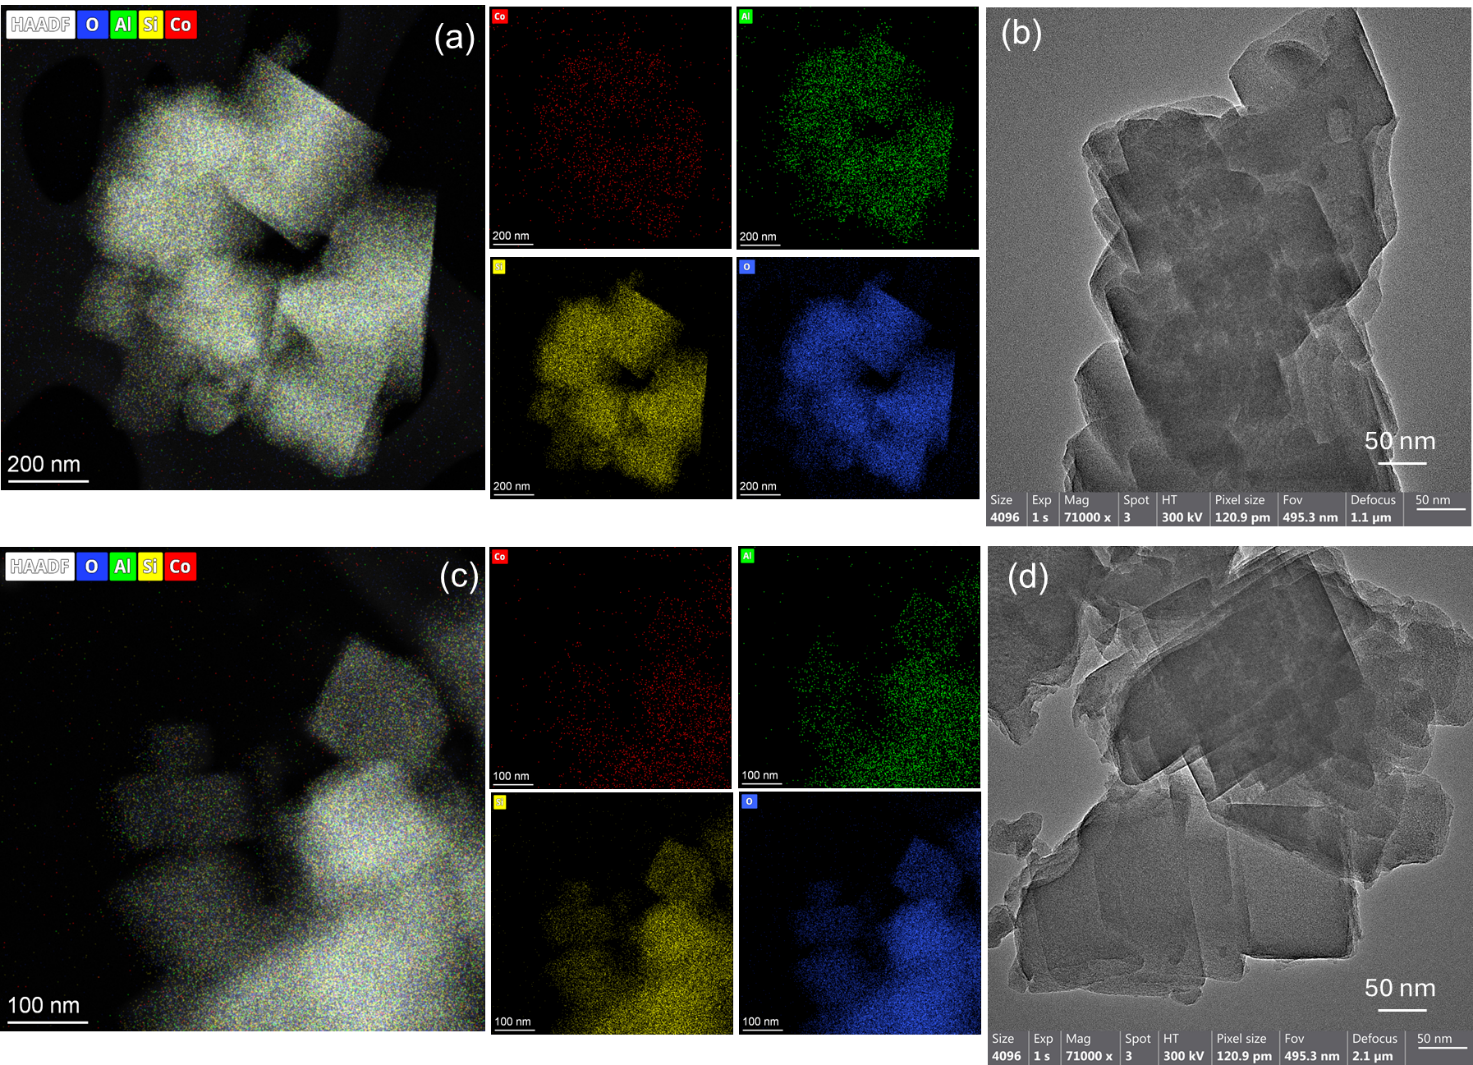
**

**Fig. S7** HAADF-STEM images and the corresponding EDS elemental mapping images of (a) 1Co/CHA and (c) 5Co/CHA zeolite catalysts. HRTEM images of (b) 1Co/CHA and (d) 5Co/CHA zeolite catalysts.

**
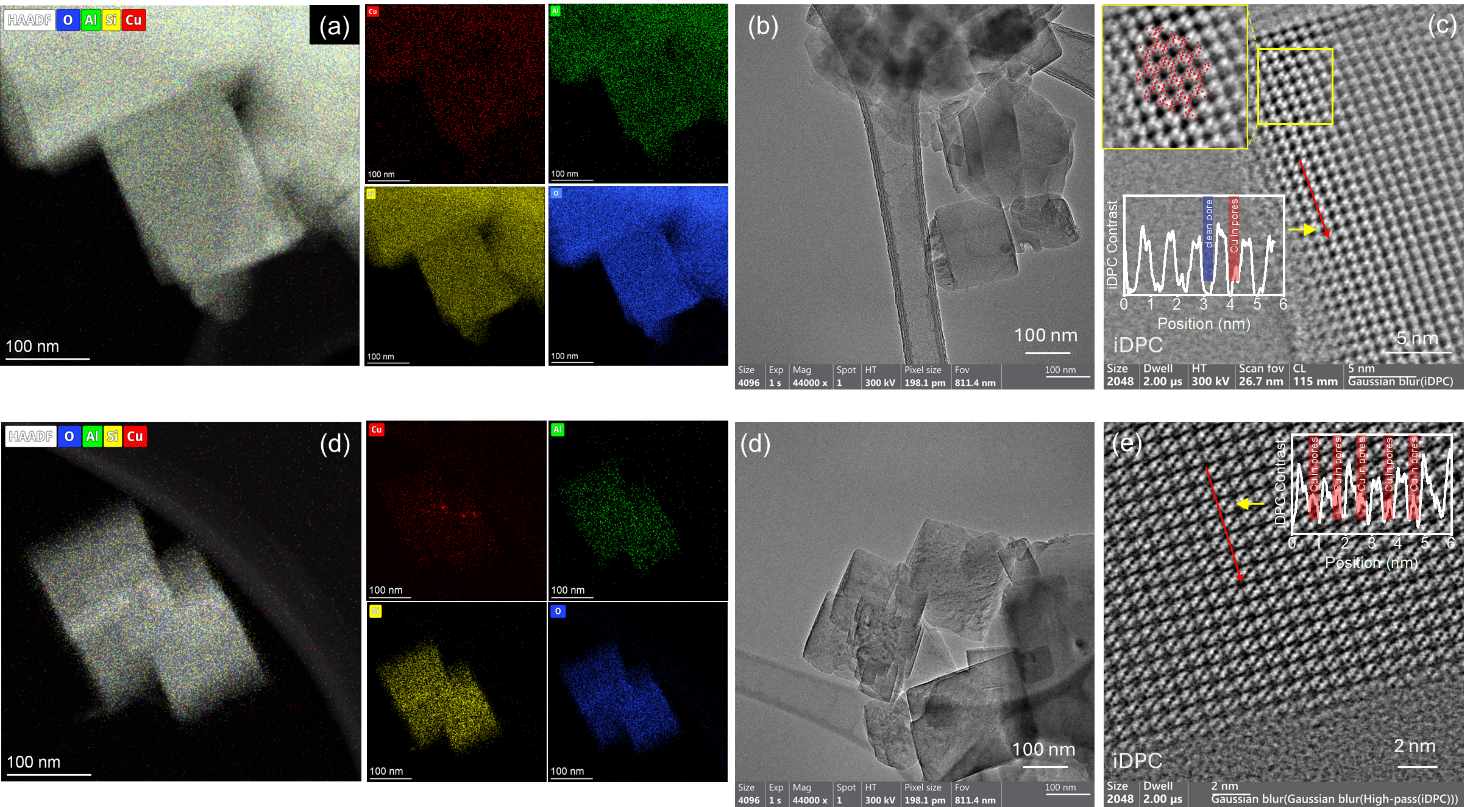
**

**Fig. S8** HAADF-STEM images and the corresponding EDS elemental mapping images of (a) 1Cu/CHA, (d) 5Cu/CHA zeolite catalysts. HRTEM images of (b) 1Cu/CHA, (d) 5Cu/CHA zeolite catalysts. *i*DPC STEM images of (c) 1Cu/CHA and (e) 5Cu/CHA zeolite catalysts.


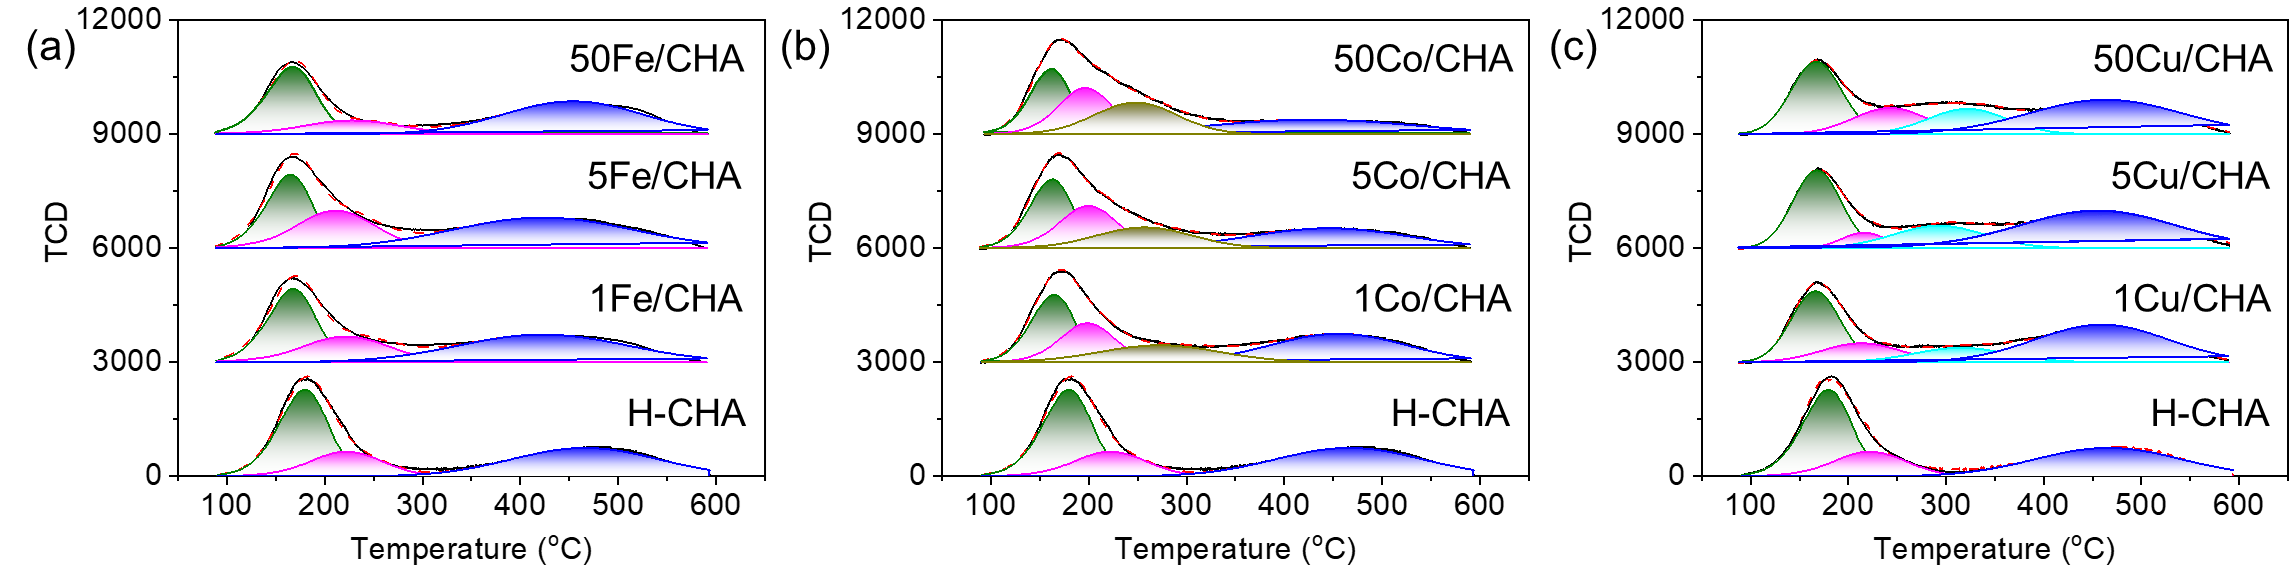


**Fig. S9** NH3-TPD curves of (a) *x*Fe/CHA, (b) *y*Co/CHA, and (c) *z*Cu/CHA zeolite catalysts in comparison with parent H-CHA zeolite.

**Fig. S10** Variation of the strong acid amount with Fe/Al ratio for Fe/CHA zeolite with low Fe content.


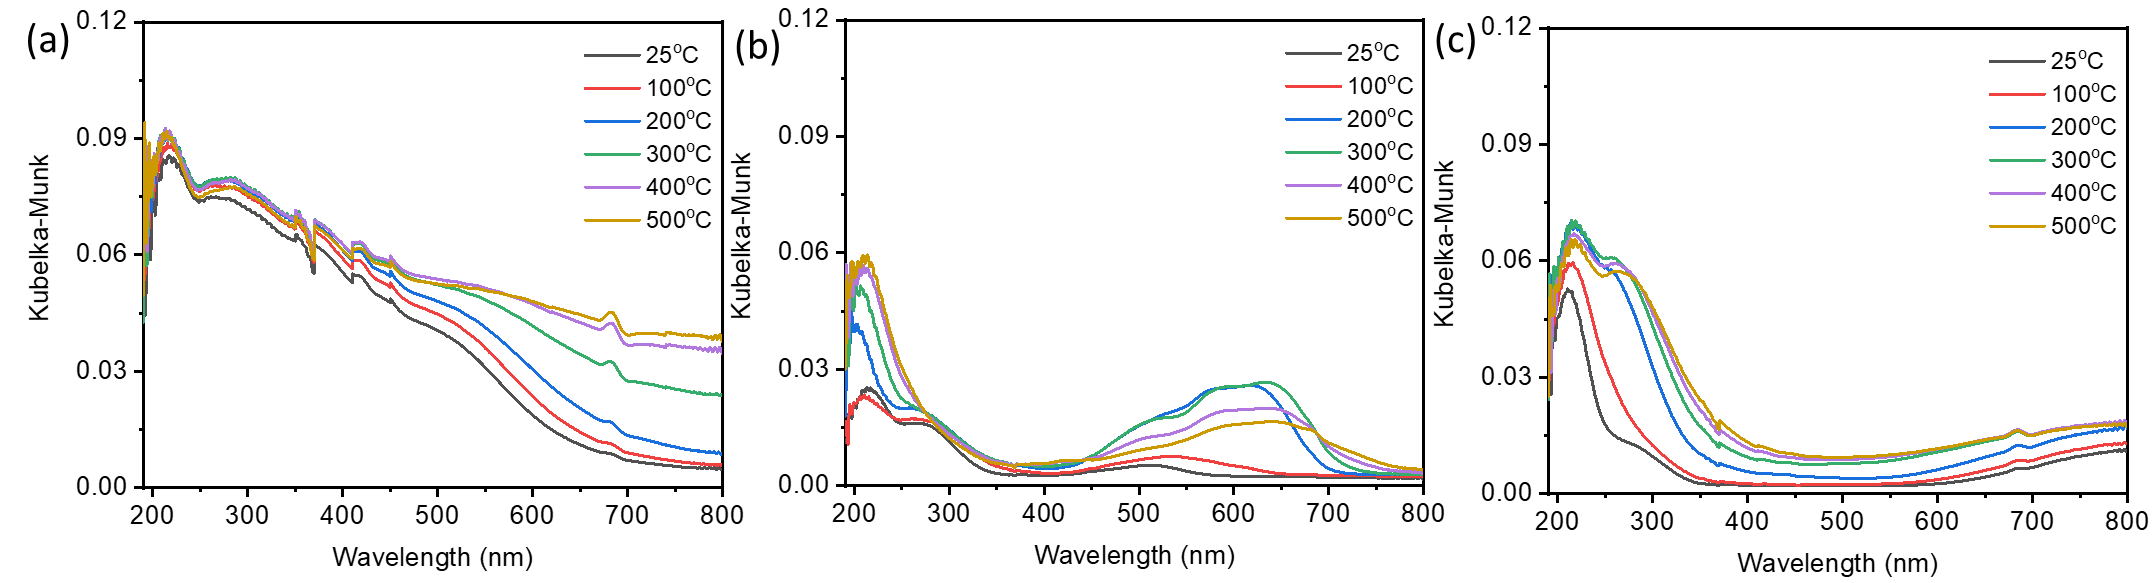
**Fig. S11** In situ UV-vis spectra of (a) 5Fe/CHA, (b) 5Co/CHA, and (c) 5Cu/CHA zeolite catalyst at 25-500 oC under the purge of Ar (20 ml/min).

**Fig. S12** Product selectivity of M/CHA zeolites in methane conversion reaction at 250 oC. Reaction conditions: 100 mg catalyst, 250 oC, CH4/N2O/H2O/Ar=10/10/2/3 ml·min-1, WHSV=15000 ml·(g·h)-1.


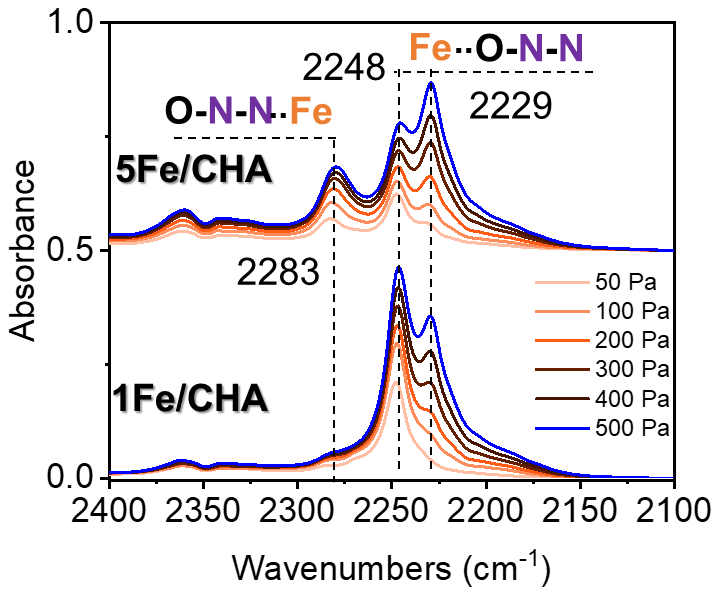


**Fig. S13** Compare N2O adsorption FTIR spectra of 1Fe/CHA and 5Fe/CHA zeolite catalyst at 25 oC after activation at 500 oC for 1 h.


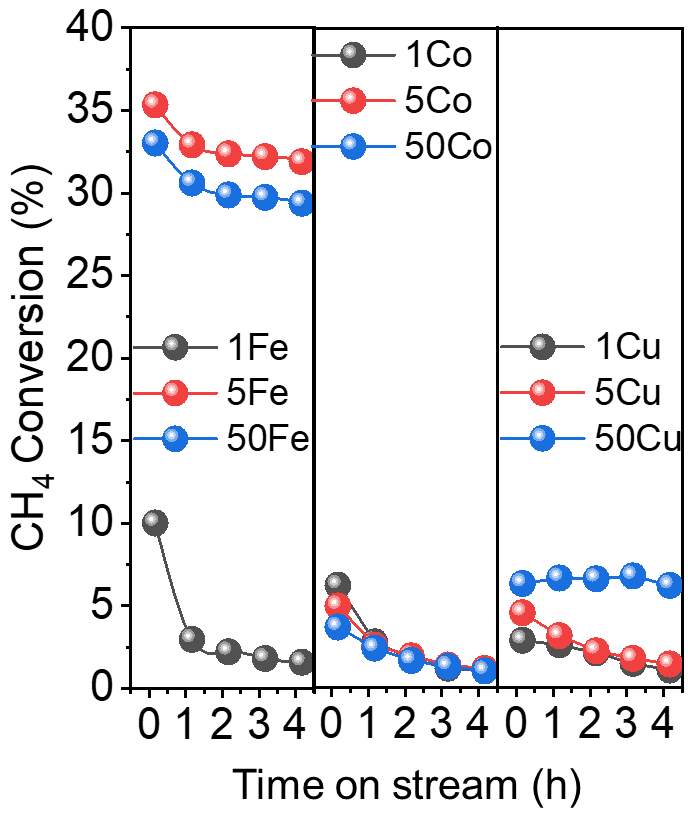


**Fig. S14** CH4 conversion of M/CHA zeolites in methane conversion reaction at 350 oC. Reaction conditions: 100 mg catalyst, CH4/N2O/H2O/Ar=10/10/2/3 ml·min-1, WHSV=15000 ml·(g·h)-1.

**
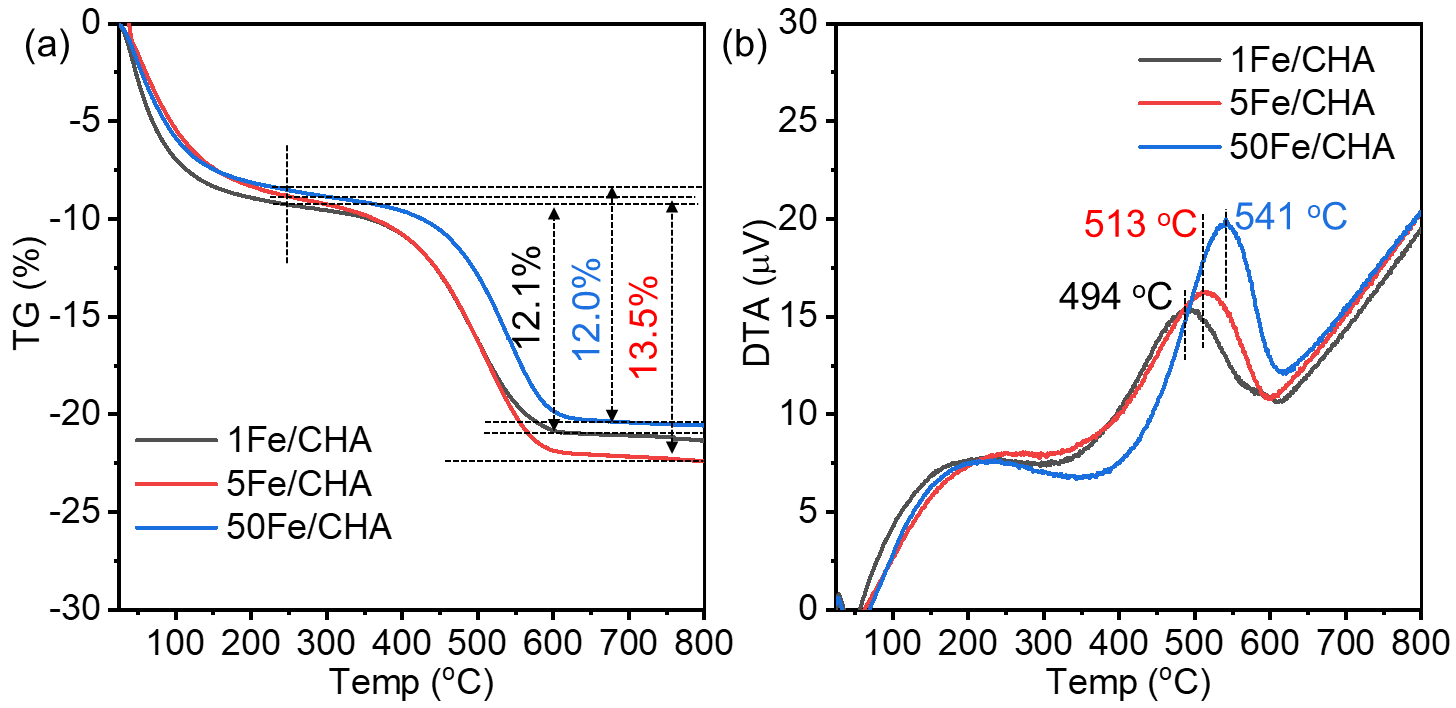
Fig. S15** (a) TG and (b) DTA curves of the spend *x*Fe/CHA zeolites in direct oxidation of methane reaction at 350 oC. Reaction conditions: 100 mg catalyst, CH4/N2O/H2O/Ar = 10/10/2/3 ml·min-1, WHSV =15000 ml·g-1·h-1.


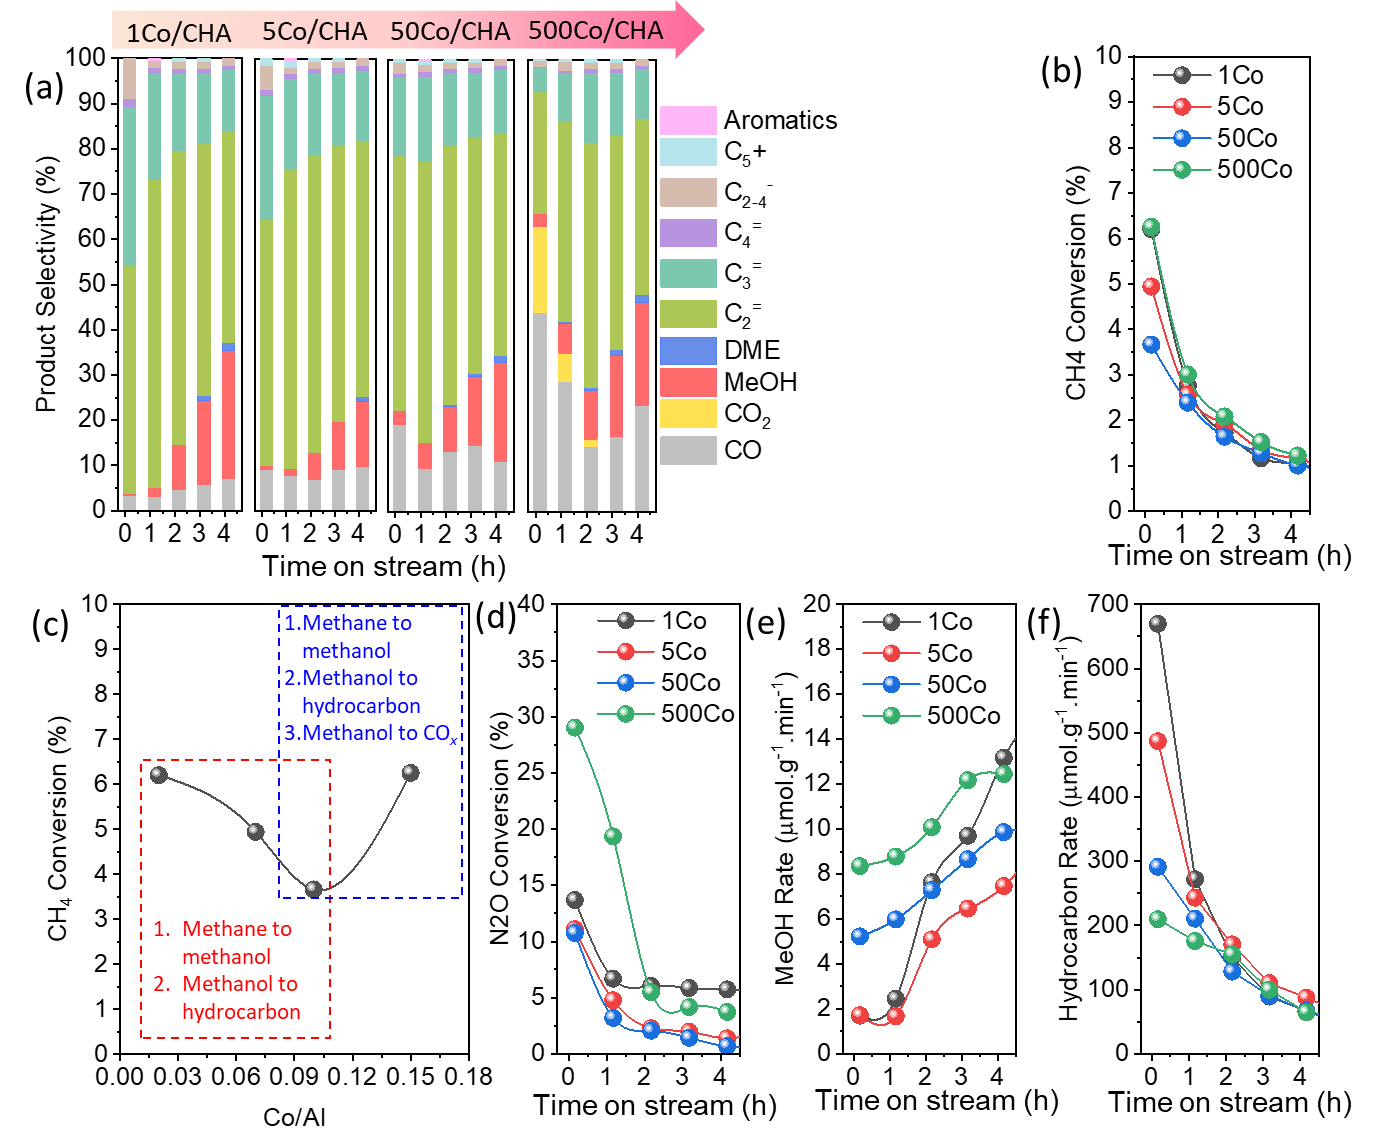


**Fig. S16** (a) Product selectivity, (b) CH4 conversion, (d) N2O conversion, (e) MeOH formation rate, (f) hydrocarbon formation rate of *y*Co/CHA zeolite catalysts at 350 oC. (c) CH4 conversion as a function of Co/Al. Reaction conditions: 100 mg catalyst, CH4/N2O/H2O/Ar=10/10/2/3 ml·min-1, WHSV =15000 ml·g-1·h-1.

**
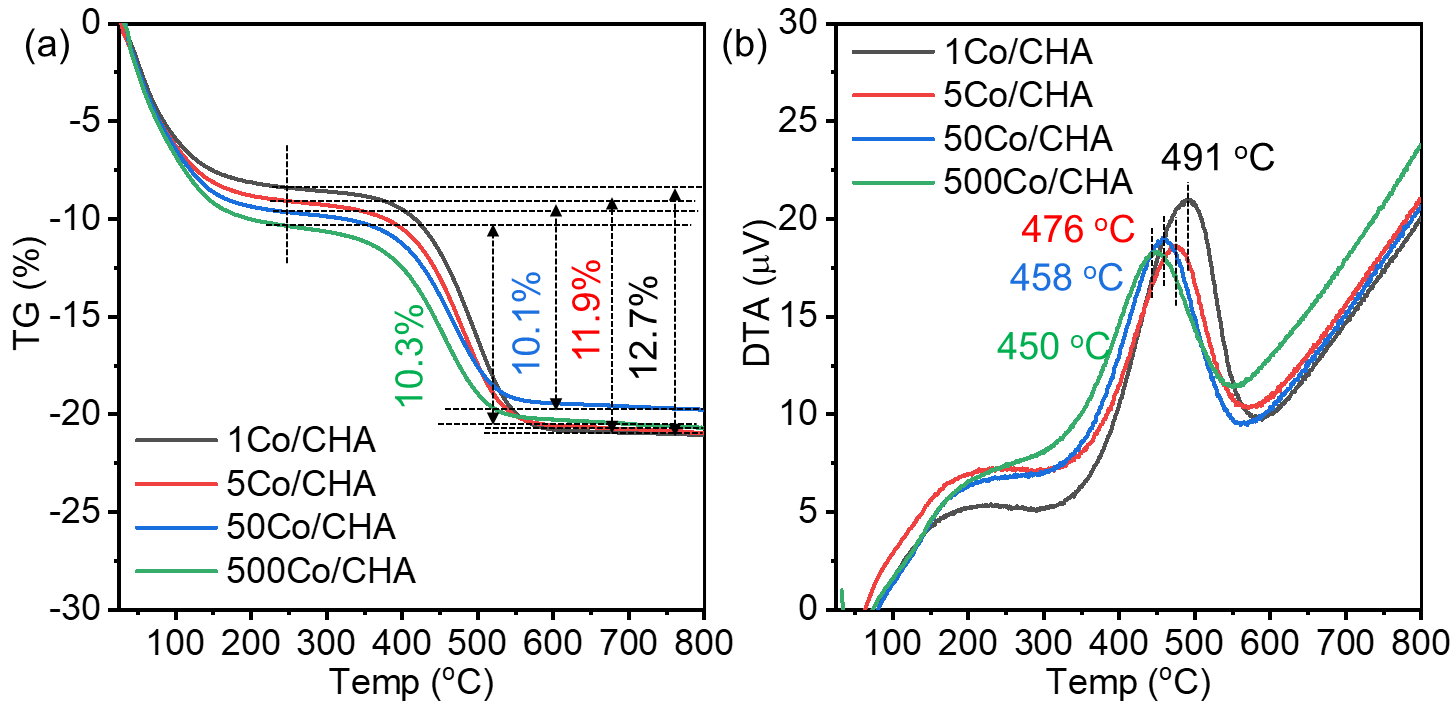
Fig. S17** (a) TG and (b) DTA curves of the spend *y*Co/CHA zeolites in the direct oxidation of methane reaction at 350 oC. Reaction conditions: 100 mg catalyst, CH4/N2O/H2O/Ar = 10/10/2/3 ml·min-1, WHSV =15000 ml·g-1·h-1.


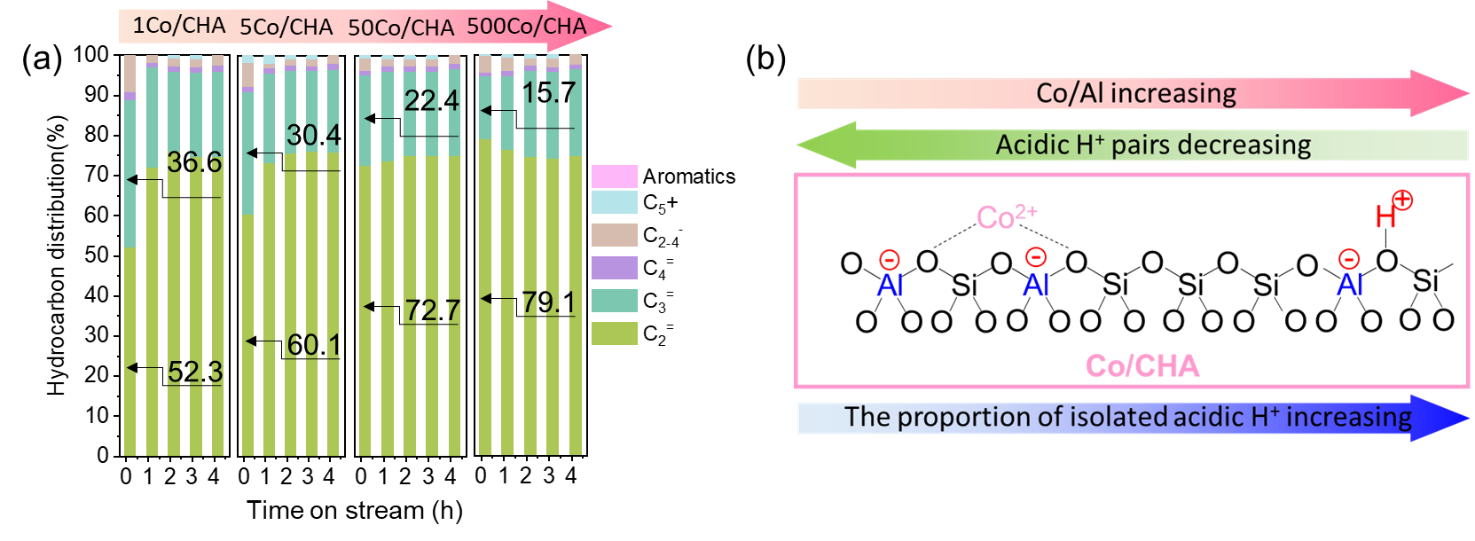


**Fig. S18** (a) Hydrocarbon distribution of *y*Co/CHA zeolite at 350 oC. Reaction conditions: 100 mg catalyst, CH4/N2O/H2O/Ar=10/10/2/3 ml·min-1. (b) Schematic diagram of Co2+ exchange with protons from Al pairs of zeolites.

**
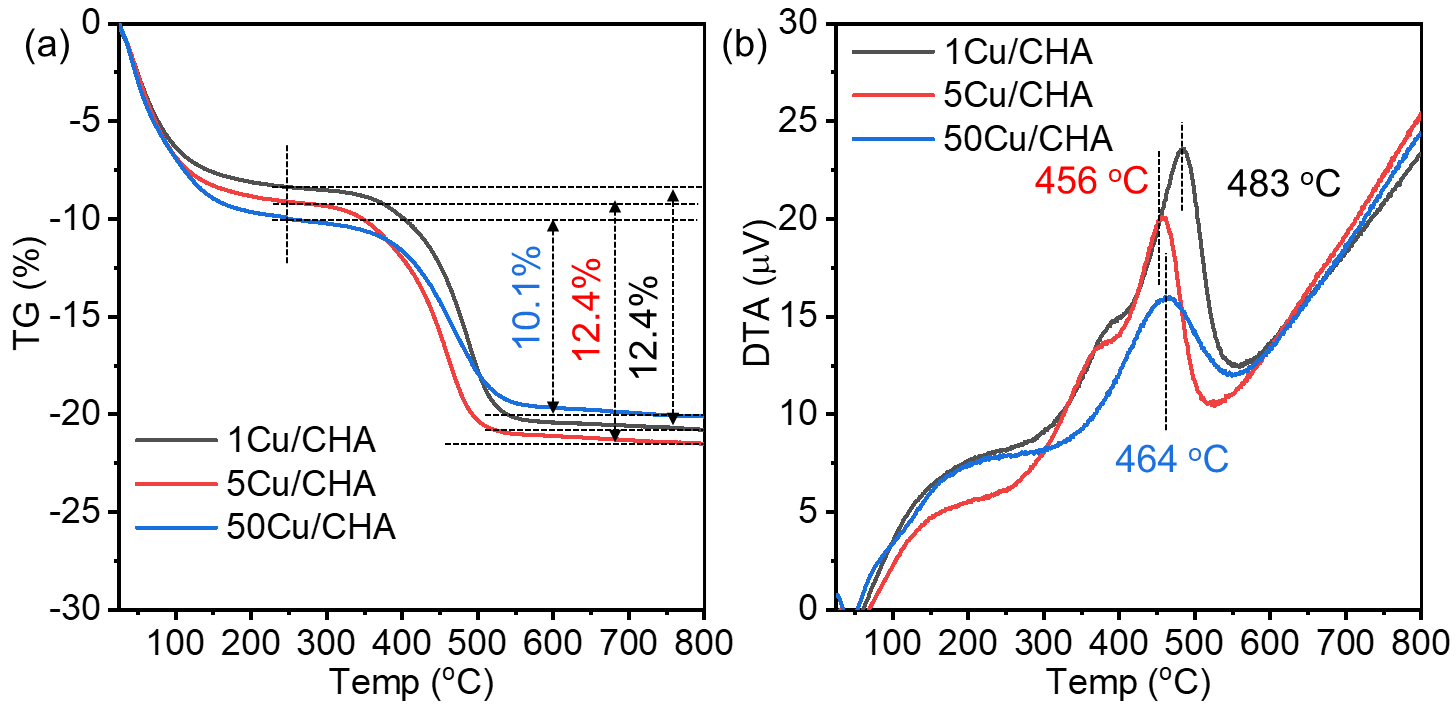
**

**Fig. S19** (a) TG and (b) DTA curves of the spend *z*Cu/CHA zeolites in the direct oxidation of methane reaction at 350 oC. Reaction conditions: 100 mg catalyst, CH4/N2O/H2O/Ar = 10/10/2/3 ml·min-1, WHSV =15000 ml·g-1·h-1.

**
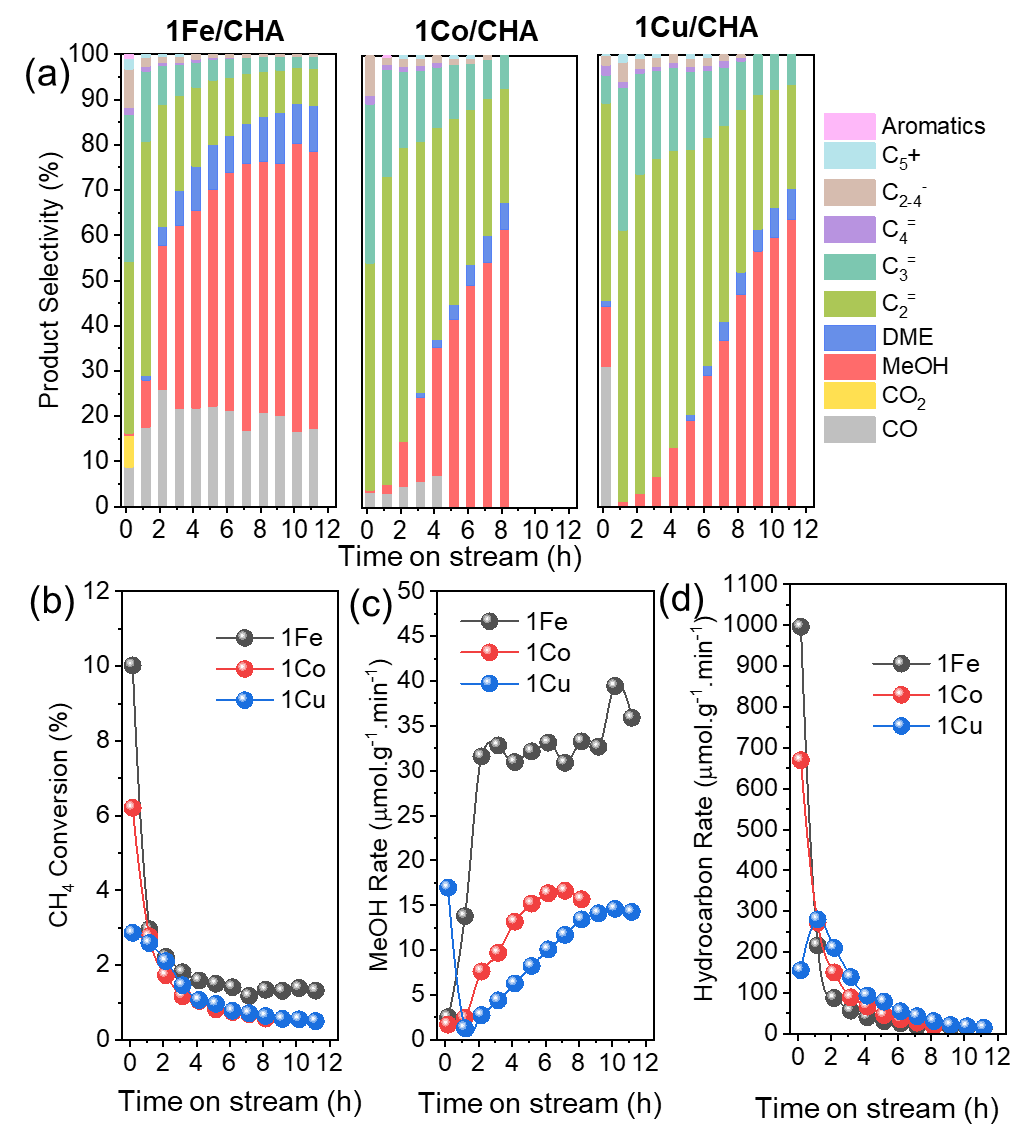
**

**Fig. S20** (a) Product selectivity, (b) CH4 conversion, (c) MeOH formation rate, (d) hydrocarbon formation rate of 1Fe/CHA, 1Co/CHA, and 1Cu/CHA at 350 oC. Reaction conditions: 100 mg catalyst, CH4/N2O/H2O/Ar=10/10/2/3 ml·min-1, WHSV =15000 ml·g-1·h-1.


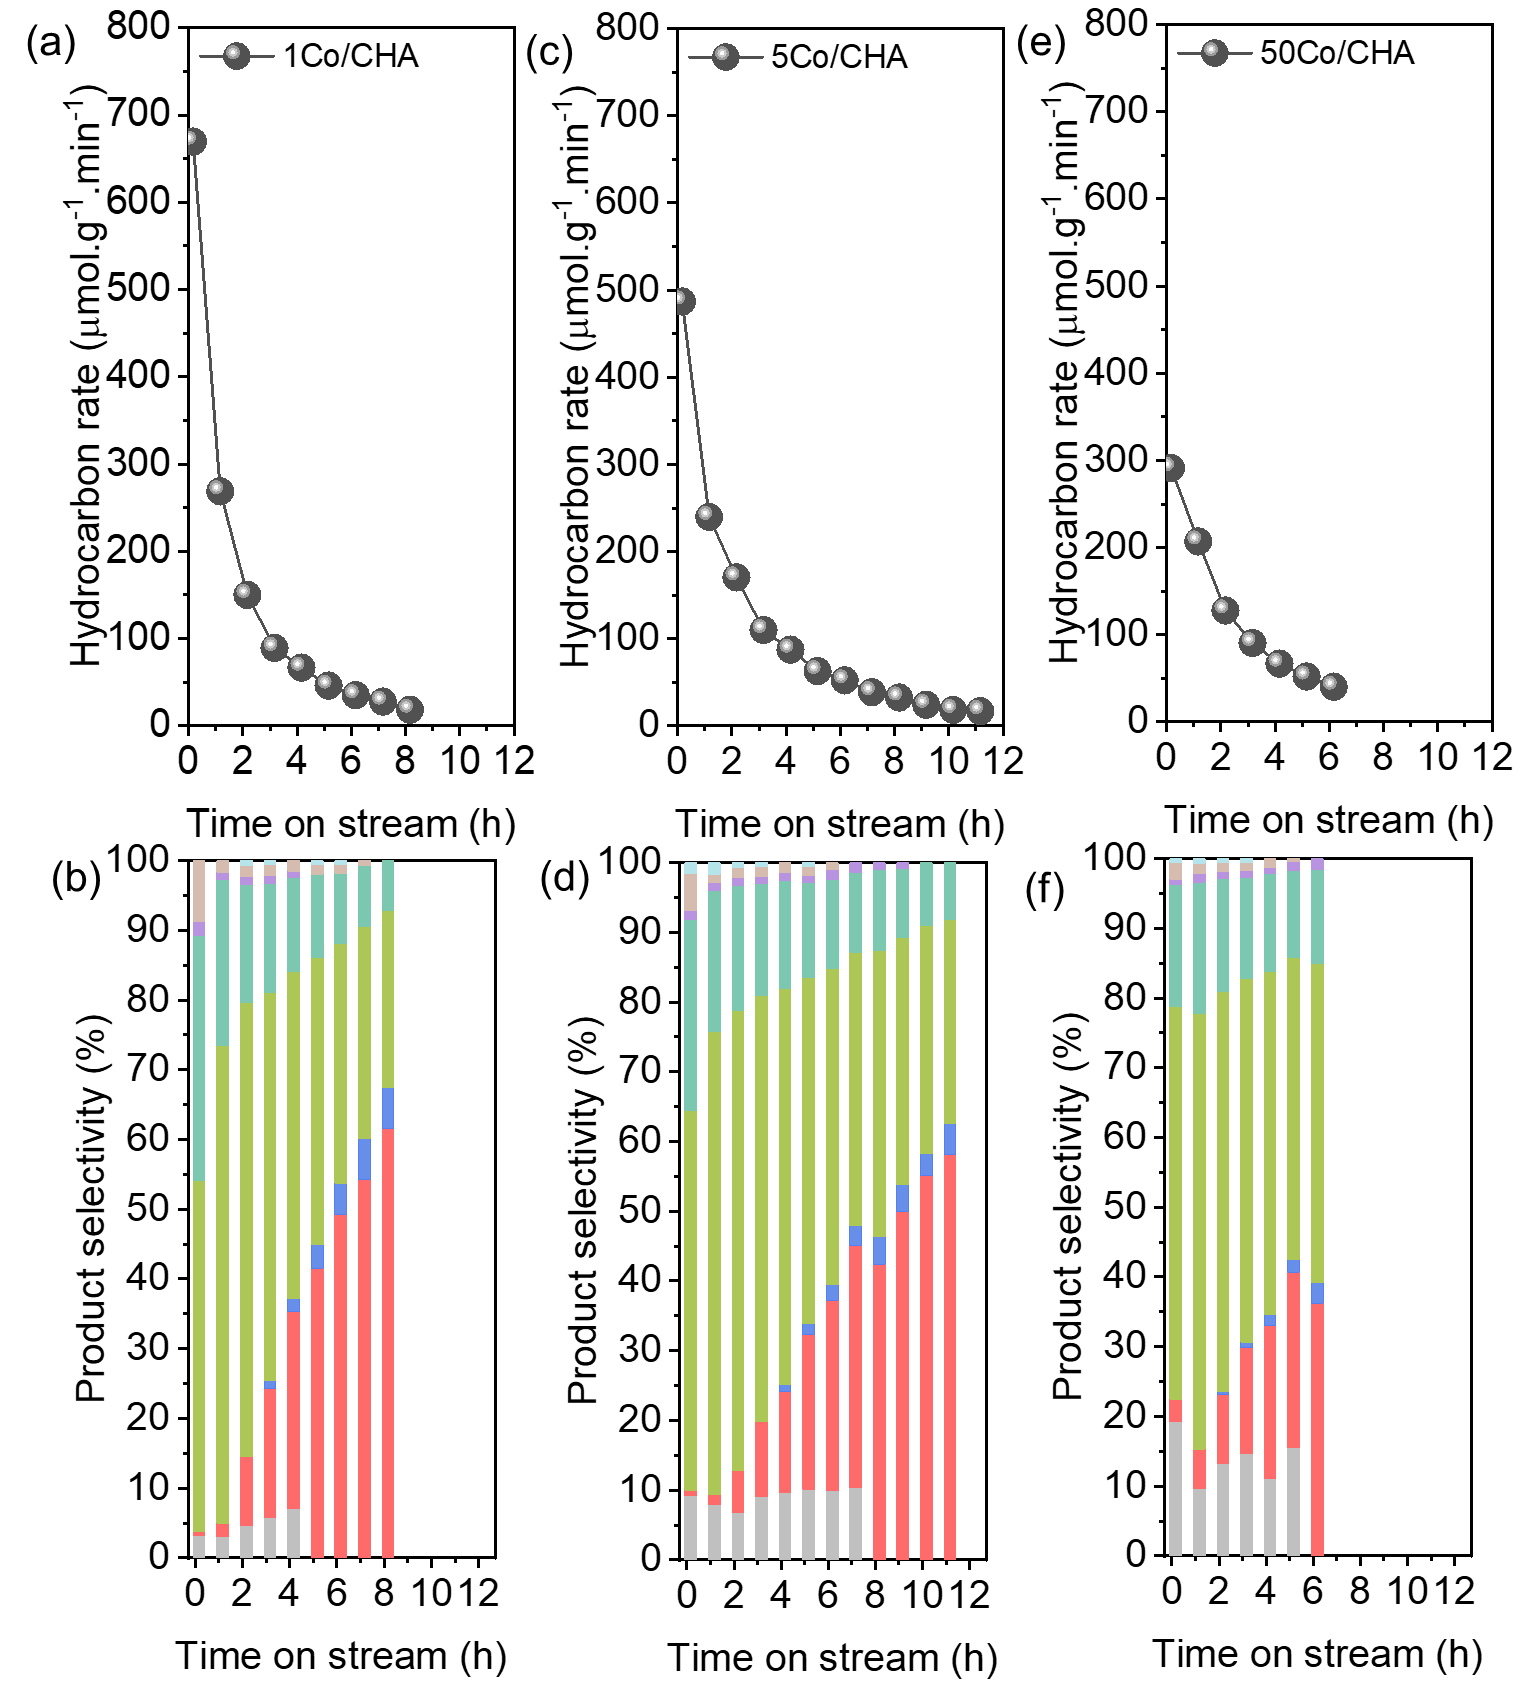


**Fig. S21** Stability test of yCo/CHA zeolites at 350 oC. Hydrocarbon formation rate of (a) 1Co/CHA, (c) 5Co/CHA, and (e) 50Co/CHA. Product selectivity of (b) 1Co/CHA, (d) 5Co/CHA, and (f) 50Co/CHA. Reaction conditions: 100 mg catalyst, CH4/N2O/H2O/Ar=10/10/2/3 ml·min-1, WHSV =15000 ml·g-1·h-1.

**Fig. S22** CH4 conversion and MeOH formation rate of 1Co/CHA zeolite. Reaction conditions: 100 mg catalyst, CH4/N2O/H2O/Ar=10/10/2/28 ml·min-1, WHSV =30000 ml·g-1·h-1.


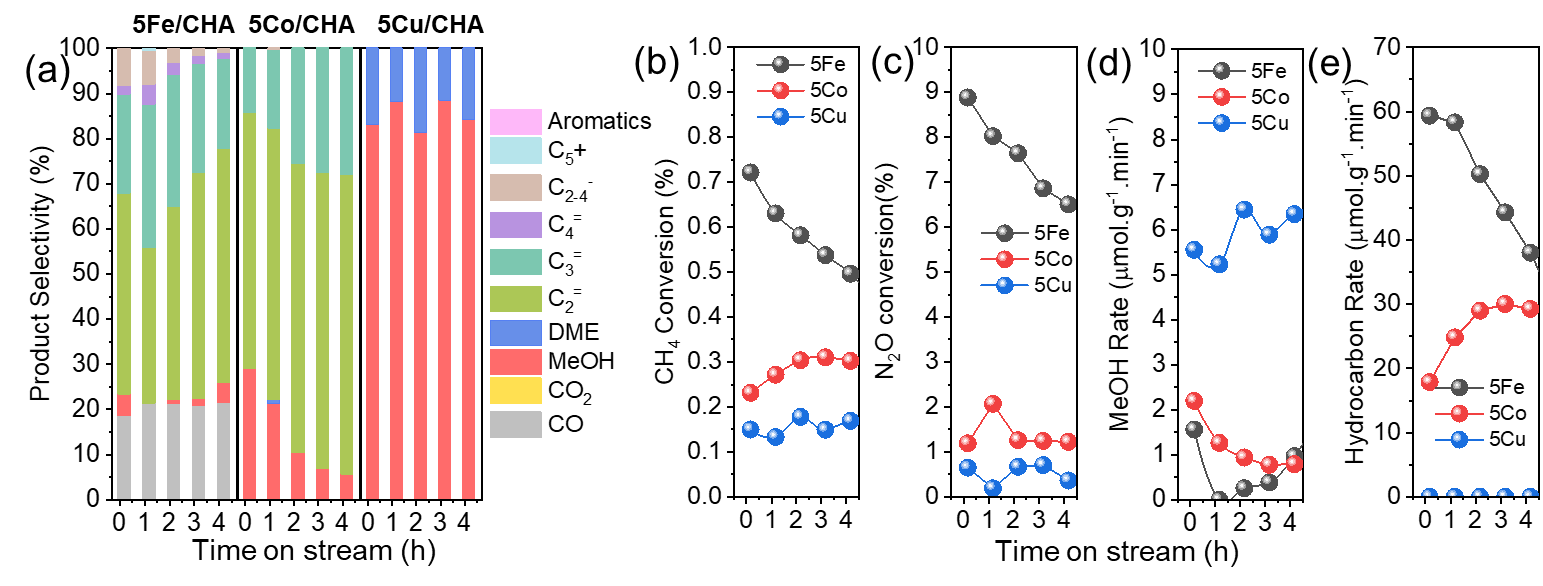
**Fig. S23** (a) Product selectivity, (b) CH4 conversion, (c) N2O conversion, (d) MeOH formation rate, (e) hydrocarbon formation rate of 5M/CHA zeolite catalysts at 300 oC. Reaction conditions: 100 mg catalyst, CH4/N2O/H2O/Ar=10/10/2/3 ml·min-1, WHSV =15000 ml·g-1·h-1.

Table S1. Texture properties of *x*Fe/CHA, *y*Co/CHA and *z*Cu/CHA zeolite catalysts.

| Sample | Textual Properties | | | |
| --- | --- | --- | --- | --- |
| SBET(m2·g-1) a | SEXT(m2·g-1) b | VTotal(cm3·g-1) a | VMic(cm3·g-1) b |
| H-CHA | 614 | 35 | 0.36 | 0.26 |
| 1Fe/CHA | 623 | 49 | 0.45 | 0.25 |
| 5Fe/CHA | 570 | 55 | 0.43 | 0.23 |
| 50Fe/CHA | 519 | 57 | 0.45 | 0.20 |
| 1Co/CHA | 617 | 33 | 0.40 | 0.26 |
| 5Co/CHA | 617 | 38 | 0.45 | 0.26 |
| 50Co/CHA | 605 | 38 | 0.40 | 0.25 |
| 1Cu/CHA | 597 | 30 | 0.39 | 0.25 |
| 5Cu/CHA | 595 | 31 | 0.40 | 0.25 |
| 50Cu/CHA | 592 | 33 | 0.45 | 0.25 |

*a* by the Brunauer–Emmett–Teller (BET) equation on the N2 adsorption isotherms.

*b* by the t-plot method based on the adsorption isotherms.

Table S2 Density of Al and transition metals in CHA zeolite.

| Sample | Al content a | | M content *b* | |
| --- | --- | --- | --- | --- |
| Al/unit cell | Al/cage | M/unit cell | M/cage |
| H-CHA | 3.1 | 1.02 | - | - |
| 1Fe/CHA | 3.0 | 0.90 | 0.3 | 0.10 |
| 5Fe/CHA | 2.7 | 0.77 | 0.9 | 0.32 |
| 50Fe/CHA | 2.3 | 0.94 | 3.4 | 1.12 |
| 1Co/CHA | 2.8 | 0.90 | 0.1 | 0.02 |
| 5Co/CHA | 2.7 | 0.87 | 0.2 | 0.06 |
| 50Co/CHA | 2.6 | 0.93 | 0.3 | 0.09 |
| 1Cu/CHA | 2.8 | 0.90 | 0.1 | 0.02 |
| 5Cu/CHA | 2.7 | 0.90 | 0.1 | 0.05 |
| 50Cu/CHA | 2.7 | 1.00 | 0.3 | 0.10 |

a Unit cell of the CHA framework contains 36-T atoms and three CHA cages.

b M means Fe, Co, and Cu in Fe/CHA, Co/CHA, and Cu/CHA, respectively.

Table S3 Chemical composition and acid amount of M/CHA zeolite catalysts.

| Sample | Chemical composition a | | | Acid amount by NH3-TPD (mmol·g-1) | | | |
| --- | --- | --- | --- | --- | --- | --- | --- |
| Si/Al | M/Al b | M content(wt.%) | LT c | MT d | HT e | Total |
| 0.1Fe/CHA | 11.0 | 0.05 | 0.39 | 0.71 | - | 0.59 | 1.30 |
| 500Co/CHA | 12.2 | 0.15 | 1.04 | 0.39 | 0.54 | 0.23 | 1.16 |

a Measured by ICP-AES

b M means Fe, Co, and Cu in Fe/CHA, Co/CHA, and Cu/CHA, respectively.

c Low temperature (LT), calculated at ca. 100-250 oC

d Medium temperature (MT), calculated at ca. 250-350C

e High temperature (HT), calculated at ca. 400-600 oC

**Reference**

1. Ravel, B.; Newville, M.; *J. Synchrotron Radiat.***2005**, 12, 537-541.
2. Bello, E.; Ferri, P.; Nero, M.; Willhammar,T.; Millet,I.; Schütze, F. W.; van Tendeloo, L.; Vennestrøm, P.N.R.; Boronat, M.; Corma, A.; Moliner, M.; NH3-SCR catalysts for heavy-duty diesel vehicles: Preparation of CHA-type zeolites with low-cost templates, *Appl. Catal. B*, **2022**, 303,120928.
